# Supplementary material
Source: PubMed Central journal article supplement (PMC4306689)
Supplement: supp_M054817_jlr.M054817-1.pdf [file supp_M054817_jlr.M054817-1.pdf]

# Activation of prostaglandin E<sub>2</sub>-EP4 signaling reduces chemokine production in adipose tissue

Eva HC Tang<sup>1,2</sup>, Yin Cai<sup>1</sup>, Chi Kin Wong<sup>1</sup>, Viviane Z Rocha<sup>3</sup>, Galina K Sukhova<sup>4</sup>, Koichi Shimizu<sup>4</sup>, Ge Xuan<sup>5</sup>, Paul M Vanhoutte<sup>1,6</sup>, Peter Libby<sup>4</sup>, Aimin Xu<sup>1,5</sup>

<sup>1</sup>Department of Pharmacology and Pharmacy, The University of Hong Kong, Hong Kong

<sup>2</sup>The Research Centre of Heart, Brain, Hormone & Healthy Aging, The University of Hong Kong.

<sup>3</sup>Lipid Clinic, Heart Institute (InCor), University of Sao Paulo, Sao Paulo – SP, Brazil.

<sup>4</sup>Cardiovascular Division, Department of Medicine, Brigham and Women's Hospital, Harvard Medical School, Boston, MA, USA.

<sup>5</sup>Department of Medicine, The University of Hong Kong, Hong Kong.

<sup>6</sup>Department of Clinical Pharmacy, King Saud University, Riyadh, Saudi Arabia

## ONLINE SUPPLEMENTAL MATERIAL

| Gene           | Forward sequence          | Reverse sequence          |
|----------------|---------------------------|---------------------------|
| IP-10          | GCCGTCATTTTCTGCCTCA       | CGTCCTTGCGAGAGGGATC       |
| MIP1 $\alpha$  | CAGCCAGGTGTCATTTTCCT      | AGGCATTCAGTTCAGGTCA       |
| MIP1 $\beta$   | TCT GCG TGT CTG CCC TCT C | TGC TGA GAA CCC TGG AGC A |
| MCP-1          | GCTGGAGCATCCACGTGTT       | ATCTTGCTGGTGAATGAGTAGCA   |
| RANTES         | GCAAGTCTCCAATCTTGCA       | CTTCTCTGGGTTGGCACACA      |
| EP1            | CTGGGCCTAACCAAGAGTGC      | CCGGAACTACGCAGTGAAC       |
| EP2            | ATGCTCCTGCTGCTTATCGT      | TAATGGCCAGGAGAATGAGG      |
| EP3            | ATGGGAAAGGAGAAGGAGTGC     | AGCCAGGCGAACTGCAATTA      |
| EP4            | CCATCGCCACATACATGAAG      | TGCATAGATGGCGAAGAGTG      |
| mPGES-1        | CTGCTGGTCATCAAGATGTACG    | CCCAGGTAGGCCACGTGTGT      |
| mPGES-2        | AAGACATGTCCCTTCTGC        | CCAAGATGGGCACTTTCC        |
| cPGES          | AGTCATGGCCTAGGTTAAC       | TGTGAATCATCATCTGCTCC      |
| $\beta$ -actin | CCTGAGCGCAAGTACTCTGTGT    | GCTGATCCACATCTGCTGGAA     |

Supplementary Table 1: Primer sequences used in quantitative real-time PCR.

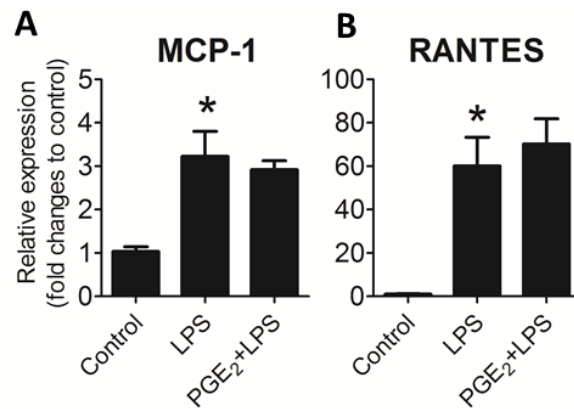

**Supplementary Figure 1: PGE<sub>2</sub> does not alter LPS-induced MCP-1 and RANTES expression.** RNA was isolated from EP4<sup>+/+</sup> adipose tissue explants pretreated with PGE<sub>2</sub> (50nM for 1.5 hours) before exposure to LPS (5ng/ml for nine hours). The mRNA expression of MCP-1 (A) and RANTES (B) are expressed as fold changes to control. N=5; p<0.05 vs. control. Data are expressed as means  $\pm$  SEM.

## Adipose tissue explants

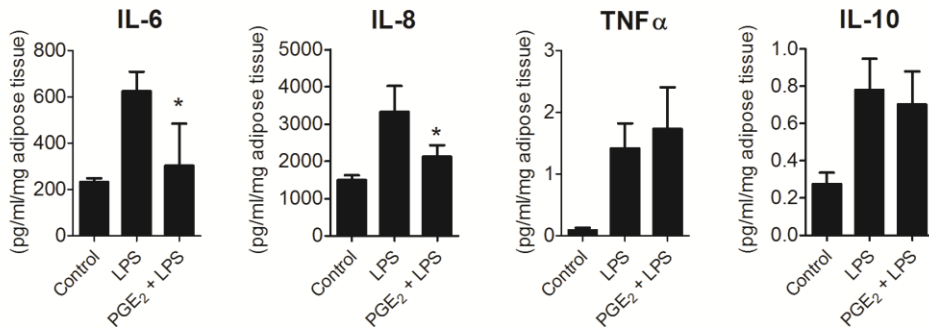

## Adipocytes

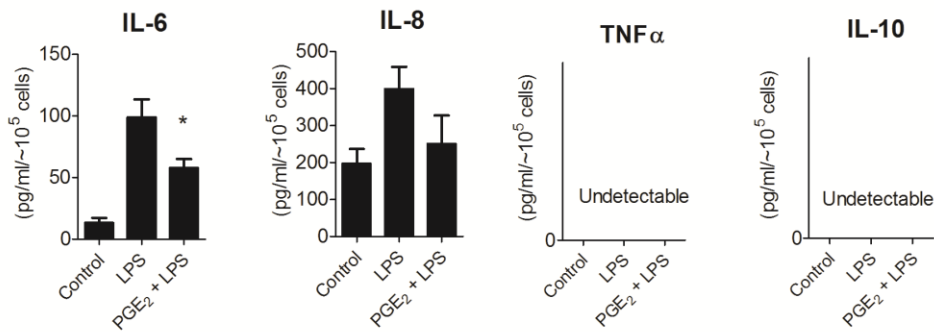

## Stromal vascular cells

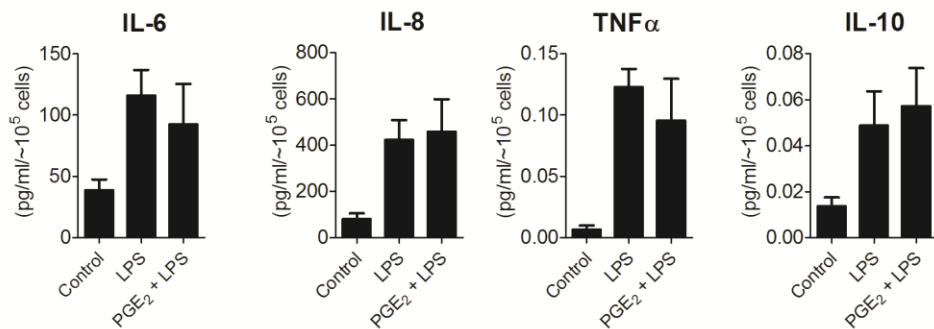

**Supplementary Figure 2: PGE<sub>2</sub> lowers LPS-stimulated cytokine production (IL-6 and IL-8) in whole adipose tissue, adipocytes but not stromal vascular cells.**

Adipose tissue explants, adipocytes or stromal vascular cells were cultured in the presence or absence of PGE<sub>2</sub> (50 nM for 1.5 hours), and then stimulated with LPS (5 ng/ml for nine hours). Supernatant medium was collected for ELISA. TNF $\alpha$  and IL-10 production are undetectable in adipocytes and their production is unaffected by

PGE<sub>2</sub> in LPS-activated adipose tissue explants and stromal vascular cells. bN=6;

\*p<0.05 vs. LPS. Data are expressed as means ± SEM.

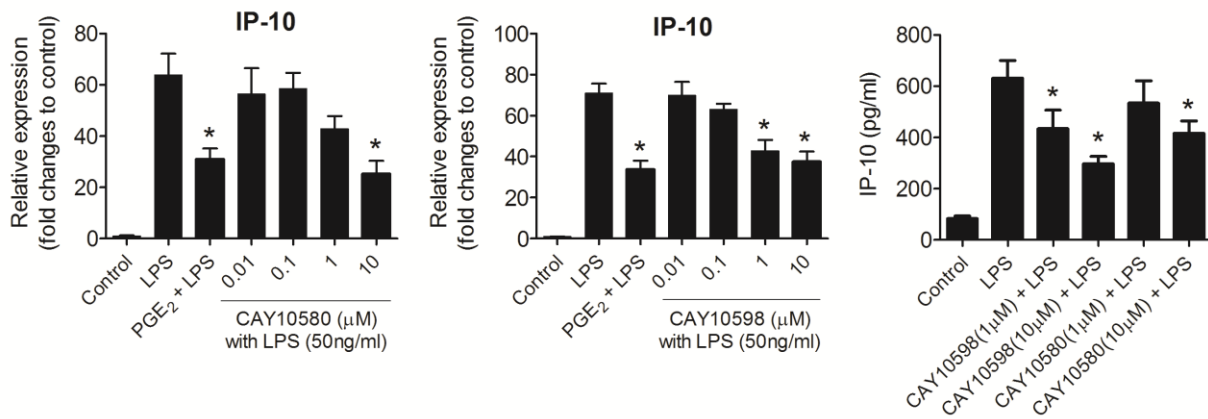

**Supplementary Figure 3:** Effect of different EP4 agonists on LPS-stimulated IP-10 production in eWAT derived from C57BL/6 mice. Pre-treatment with CAY10580 and CAY10598 at various concentrations on LPS-stimulated IP-10 mRNA and protein levels. All mRNA data are expressed as fold changes from control. Protein changes are expressed as absolute amount produced (pg/ml). N=6; \*p<0.05 vs. LPS. Data are expressed as means  $\pm$  SEM.

## MIP-1 $\alpha$

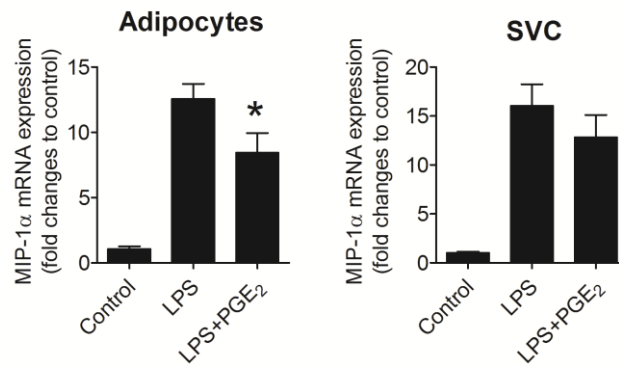

**Supplementary Figure 4: PGE<sub>2</sub> lowers MIP-1 $\alpha$  mRNA in LPS-activated adipocytes but not in stromal vascular cells (SVC).** Adipocytes and SVC separated by collagenase digestion of EP4<sup>+/+</sup> adipose tissue were cultured in the presence or absence of PGE<sub>2</sub> (50 nM for 1.5 hours), and then stimulated with LPS (5 ng/ml for nine hours). RNA then was isolated and MIP-1 $\alpha$  mRNA was quantified. N=6; \*p<0.05 vs. LPS. Data are expressed as means  $\pm$  SEM.

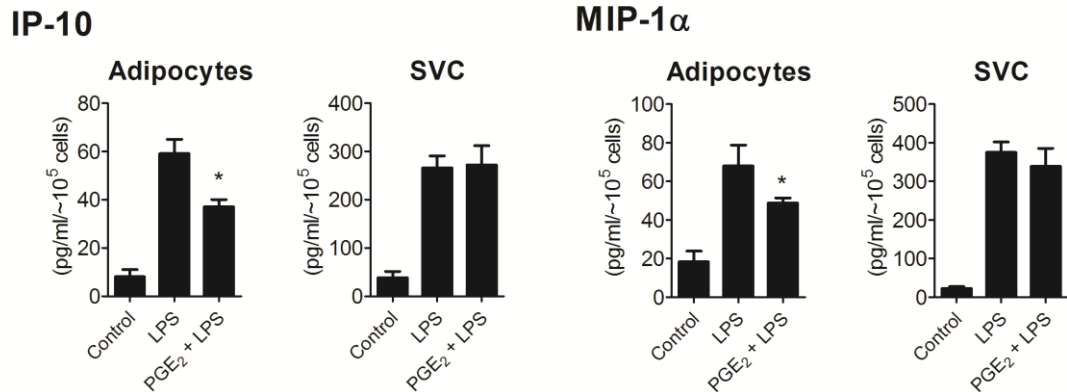

**Supplementary Figure 5: PGE<sub>2</sub> lowers IP-10 and MIP-1α protein levels in LPS-activated adipocytes, but not in stromal vascular cells (SVC).** Adipocytes and SVC separated by collagenase digestion of EP4<sup>+/+</sup> adipose tissue were cultured in the presence or absence of PGE<sub>2</sub> (50 nM for 1.5 hours), and then stimulated with LPS (5 ng/ml for nine hours). For protein analysis, approximately, 10,000 cells were seeded into each well and treated accordingly. Supernatant medium was collected for ELISA. N=6; \*p<0.05 vs. LPS. Data are expressed as means ± SEM.

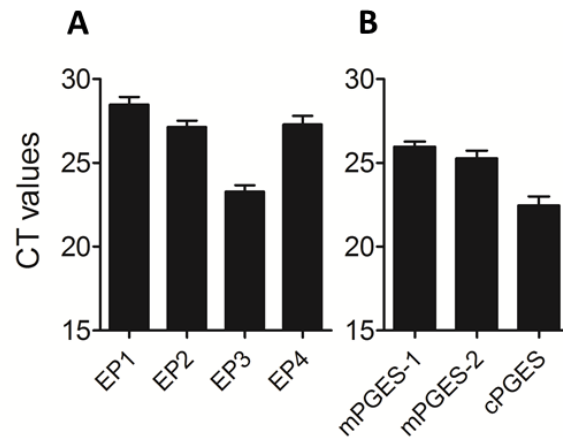

**Supplementary Figure 6: Expression of EP receptors and PGE<sub>2</sub> synthases in eWAT of EP4<sup>+/+</sup> mice.** Critical Threshold (CT) values for EP1, EP2, EP3, EP4 (A) and mPGES-1, mPGES-2, cPGES (B) expression. Values are obtained from the same eWAT sample run in the same PCR reaction. Lower CT values indicate higher abundance. N=6. Data are expressed as means + SEM.



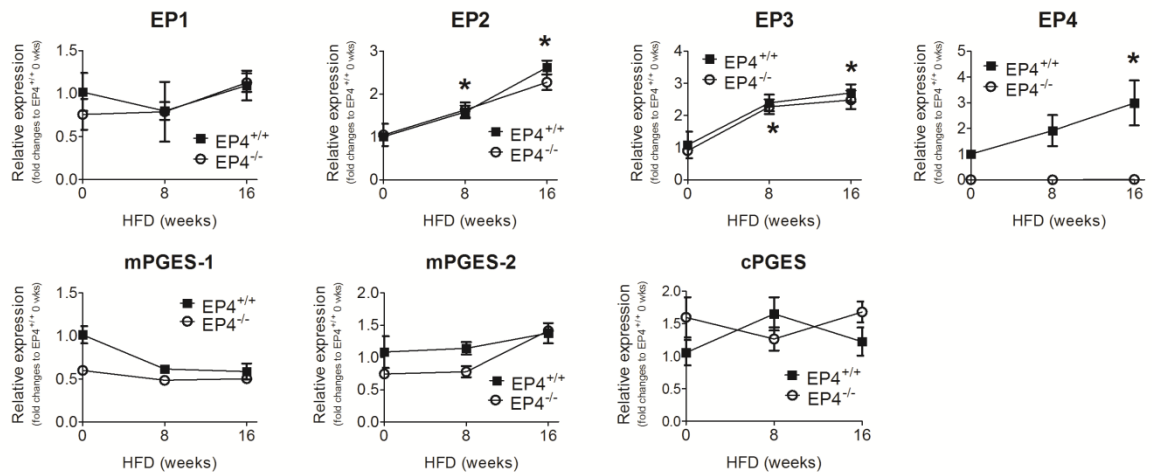

**Supplementary Figure 7: Expression of EP receptors and PGE<sub>2</sub> synthases during consumption of high-fat diet.** mRNA expression of EP1, EP2, EP3, EP4, mPGES-1, mPGES-2, cPGES in eWAT of EP4<sup>+/+</sup> and EP4<sup>-/-</sup> mice. N=6; \*p<0.05 vs. 0 weeks (mice of the same genotype). Data are expressed as means ± SEM.

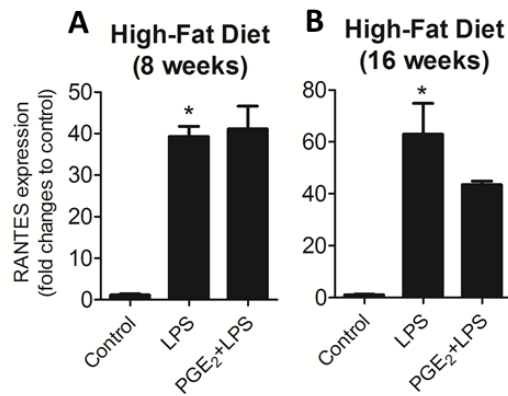

**Supplementary Figure 8: PGE<sub>2</sub> does not reduce LPS-induced RANTES expression in adipose tissue derived from high-fat fed mice.** RNA was isolated from eWAT of EP4<sup>+/+</sup> mice fed a high-fat diet for 8- (A) or 16-(B) weeks. The eWAT was pretreated with PGE<sub>2</sub> (50nM for 1.5 hours) prior to exposure to LPS (5ng/ml for nine hours). N=5; p<0.05 vs. control. Data are expressed as means ± SEM.

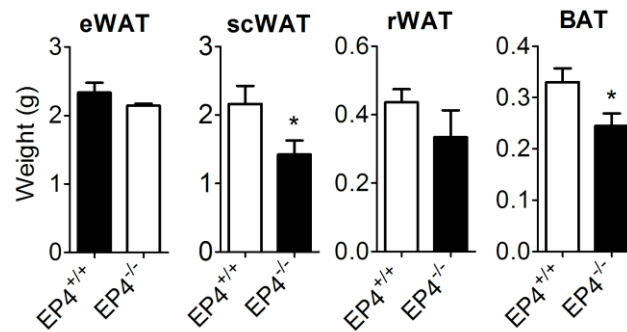

**Supplementary Figure 9: EP4<sup>-/-</sup> mice have reduced adipose tissue depots.** Weight of epididymal (eWAT), subcutaneous (scWAT), peri-renal (rWAT) white adipose tissue and brown adipose tissue (BAT) in EP4<sup>+/+</sup> and EP4<sup>-/-</sup> after 16 weeks of high-fat diet. N=5; \*p<0.05 EP4<sup>+/+</sup> vs. EP4<sup>-/-</sup>. Data are expressed as means  $\pm$  SEM.
